# Supplementary material for: Intravitreal Dexamethasone Implant at the Time of Silicone Oil Removal to Treat Persistent Macular Edema after Rhegmatogenous Retinal Detachment Repair
Source: MDPI journal article supplement (doi:10.3390/jcm12041697), 2023-02-20
Supplement: s1 [file s1]

**Table S1.** Multiple linear regression model of CMT at 6 months after DEX-I and all variables together in the model.

| <b>6m Post DEX-I CMT</b>       |        |       |      |                 |
|--------------------------------|--------|-------|------|-----------------|
| Gender (w)                     | -16.87 | 20.26 | 0.41 | -58.90 to 25.15 |
| Age (yrs)                      | 0.74   | 1.24  | 0.56 | -1.84 to 3.32   |
| Glaucoma (Yes)                 | 31.83  | 22.90 | 0.18 | -15.67 to 79.33 |
| Pseudophakic                   | -4.03  | 21.33 | 0.85 | -48.26 to 40.19 |
| Days between PPV and CME onset | -1.75  | 1.21  | 0.16 | -4.28 to 0.76   |
| Days of topic therapy          | -0.70  | 1.75  | 0.68 | -4.26 to 2.85   |
| Days between PPV and DEX-I     | -0.67  | 1.82  | 0.71 | -4.46 to 3.11   |
| RRD Macula (On)                | -21.47 | 23.44 | 0.37 | -70.10 to 27.15 |
